# Supplementary material for: House dust mite (HDM) and storage mite (SM) molecular sensitisation profiles and association with clinical outcomes in allergic asthma and rhinitis: protocol for a systematic review
Source: PubMed Central journal article supplement — BMJ Open. 2021 Jul 26;11(7):e046519. doi: 10.1136/bmjopen-2020-046519 (PMC8314702; doi:10.1136/bmjopen-2020-046519), 2021-07-26
Supplement: bmjopen-2020-046519supp002.pdf [file bmjopen-2020-046519supp002.pdf]

***House Dust Mite (HDM) and Storage Mite (SM) molecular sensitisation profiles and association with clinical outcomes in allergic asthma and rhinitis: a systematic review***  
***Matos-Semedo F, Cruz C, Inácio F, Gama JMR, Nwaru BI, Taborda-Barata L***

**Supplementary File 2**

**Search strategy for** Cochrane Library (Cochrane Database of Systematic Reviews, Cochrane Central Register of Controlled Trials (CENTRAL), Cochrane Methodology Register), MEDLINE, EMBASE, AMED

- 
1. house dust mites.mp. or exp house dust mites/
  2. exp storage mites/ or storage mites.mp.
  3. mites.mp. or exp mites/
  4. exp pyroglyphidae/ or pyroglyphidae.mp.
  5. glycyphagidae.mp or exp glycyphagidae/
  6. exp echimyopodidae/ or echimyopodidae.mp.
  7. chortoglyphidae.mp or exp chortoglyphidae/
  8. exp acaridae/ or acaridae.mp
  9. Dermatophagoides pteronyssinus.mp. or exp Dermatophagoides pteronyssinus/
  10. Dermatophagoides farinae.mp. or exp Dermatophagoides farinae/
  11. Euroglyphus maynei.mp or exp Euroglyphus maynei/
  12. Glycyphagus domesticus.mp or exp Glycyphagus domesticus/
  13. Lepidoglyphus destructor.mp. or exp Lepidoglyphus destructor/
  14. Blomia tropicalis.mp. or exp Blomia tropicalis/
  15. Chortoglyphus arcuatus.mp or exp Chortoglyphus arcuatus/
  16. 1 or 2 or 3 or 4 or 5 or 6 or 7 or 8 or 9 or 10 or 11 or 12 or 13 or 14 or 15
  17. exp molecular allergens/ or molecular allergens.mp
  18. Der p 1.mp or exp Der p 1/
  19. Der p 2.mp or exp Der p 2/
  20. Der p 3.mp or exp Der p 3/
  21. Der p 10.mp or exp Der p 10/
  22. Der p 23.mp or exp Der p 23/
  23. Der f 1.mp or exp Der f 1/
  24. Der f 2.mp or exp Der f 2/
  25. Der f 3.mp or exp Der f 3/
  26. Der f 10.mp or exp Der f 10/
  27. Blo t 1.mp or exp Blo t 1/
  28. Blo t 2.mp or exp Blo t 2/
  29. Blo t 3.mp or exp Blo t 3/
  30. Blo t 10.mp or exp Blo t 10/
  31. Lep d 2.mp or exp Lep d 2/
  32. 17 or 18 or 19 or 20 or 21 or 22 or 23 or 24 or 25 or 26 or 27 or 28 or 29 or 30 or 31
  33. exp asthma/ or asthma.mp.
  34. wheez\*.mp. or exp wheezing/
  35. exp allergic rhinitis/ or rhinit\*.mp. or exp rhinitis/
  36. 33 or 34 or 35

37. exp Epidemiologic Methods/
38. \*cohort studies/ or cohort.ti,ab.
39. (longitudinal or prospective).ti,ab.
40. \*case-control studies/
41. Control groups/ or control group\*.ti,ab.
42. Matched-pair analysis/
43. (case\* adj5 control\*).ti,ab.
44. (case\* adj3 comparison\*).ti,ab.
45. (case\* adj3 referen\*).mp.
46. (case\* adj1 base).mp.
38. (case\* adj1 cohort).mp.
47. exp cross-sectional studies/ or cross-sectional.ti,ab.
48. 37 or 38 or 39 or 40 or 41 or 42 or 43 or 44 or 45 or 46 or 47
49. 16 and 32 and 48
50. limit 49 to yr="1970 -Current"

**Search strategy for ISI Web of Science (Science and Social Science Index), CINAHL.**

(house dust mites or storage mites) AND (allergens or molecular allergens) AND  
((asthma or bronchial asthma or wheeze or wheezing) OR (rhinitis or allergic rhinitis))
